# Supplementary material for: RNA-Seq-Based Profiling of pl Mutant Reveals Transcriptional Regulation of Anthocyanin Biosynthesis in Rice (Oryza sativa L.)
Source: MDPI journal article supplement (doi:10.3390/ijms22189787), 2021-09-10
Supplement: s1 [file s1]

**Table S10.** Total anthocyanin content (umole g-1 FW) of leaf and leaf sheath of *pl* mutant and WT samples

|        | WT           | <i>pl</i>    |
|--------|--------------|--------------|
| Leaf   | 0.155 ± 0.01 | 0.405 ± 0.03 |
| Sheath | 0.112± 0.02  | 0.912 ± 0.06 |

**Table S11.** List of the primers used in this study for qRT-PCR

| Gene ID             | Forward primer               | Reverse primer                |
|---------------------|------------------------------|-------------------------------|
| <i>Os02g0626100</i> | <i>CGGTCGTTCCCGCTCTAC</i>    | <i>TCGCCGTTCCACTCCTT</i>      |
| <i>Os02g0626400</i> | <i>ACCGCCTCCGGTGACT</i>      | <i>CGCCCTTGAACCCATAG</i>      |
| <i>Os04g0518400</i> | <i>CTCTGCTCCAGGGGTACTCT</i>  | <i>GCTTCTTCGCCAGCATCATG</i>   |
| <i>Os05g0427400</i> | <i>CACATCTTGGAAGGCAG</i>     | <i>GAGAGGTTGGAGGGCAG</i>      |
| <i>Os02g0177600</i> | <i>ACGACGAGATCTTCATCGT</i>   | <i>TTGTAGAACACCACCTCTTT</i>   |
| <i>Os08g0448000</i> | <i>CGAGAAGACGATCGACAAGGA</i> | <i>TCAGCACGCCGGAATTCCAGCA</i> |
| <i>Os03g0122300</i> | <i>CGCTACCTCCCTGATTGG</i>    | <i>ACCTTCTTGATGTAGTCCT</i>    |
| <i>Os08g0441500</i> | <i>TTCCACACCGCCTCCCC</i>     | <i>GATGGCAATCCCGCCCTG</i>     |
| <i>Os05g0320700</i> | <i>ATCCCGCTGCTGGTGCC</i>     | <i>GGCGTGCTTGAGGATCT</i>      |
| <i>Os10g0512400</i> | <i>TTCAACCTCACCAAGAAC</i>    | <i>TCTTGTCGATGAACCTGTC</i>    |
| <i>Os01g0196300</i> | <i>CGTGCAAACCTAACATTACA</i>  | <i>GGCACCTCCCTTTTTCTTCTT</i>  |
| <i>Os01g0838350</i> | <i>TGTAGGGCAACTAAACAAC</i>   | <i>TGACAAATACTAGTTCACCA</i>   |
| <i>Os01g0734800</i> | <i>GTGTTCTCCGCGGAGCAGCT</i>  | <i>TTCTCCACATCGGACAGGAA</i>   |
| <i>Os11g0116300</i> | <i>ATGTACTGTGCAGTGGGCACA</i> | <i>TCATGCAGAGAGCAGTGCTGC</i>  |
| <i>Os02g0611800</i> | <i>ATGAAGATCAACGTGCGG</i>    | <i>CCGCACGTTGATCTTCAT</i>     |
| <i>Os02g0194700</i> | <i>ATCCTGTCGTCGCACTCC</i>    | <i>AGCTCGTACGGCACGAT</i>      |
| <i>Os11g0610700</i> | <i>CAATCCGCCTCCTCCGGT</i>    | <i>AGCCCTCAAAGCTATATTA</i>    |
| <i>Os07g0543100</i> | <i>TCAACTTCACCTGCGCC</i>     | <i> TTCCTGACGAAGGCCTTGAA</i>  |
| <i>Os02g0738100</i> | <i>CACAGGCTACCACCGTT</i>     | <i>ATGAGTATAGAGCTGGGACTT</i>  |
| <i>Os04g0662600</i> | <i>AACTTCTACCCCAAGTGCCCC</i> | <i>GTCGAGAGACTTGGGCTTCT</i>   |
| <i>Actin</i>        | <i>GTGGTCGCCCCTCCTGAAAG</i>  | <i>GGCTTAGCATTCTTGGGTCCG</i>  |
