# Supplementary material for: RNA-Seq-Based Profiling of pl Mutant Reveals Transcriptional Regulation of Anthocyanin Biosynthesis in Rice (Oryza sativa L.)
Source: MDPI journal article supplement (doi:10.3390/ijms22189787), 2021-09-10
Supplement: s1 [file s1]

**Table S1.** Summary of total SNPs in WT and *pl* compared with the reference genome

|                         | WT    | <i>pl</i> |
|-------------------------|-------|-----------|
| Total SNP (No.)         | 58361 | 59358     |
| Total INDEL (No.)       | 5297  | 5648      |
| SNP_effect_region       |       |           |
| Intergenic region (No.) | 8195  | 8451      |
| 5-UTR (No.)             | 9000  | 8526      |
| CDS (No.)               | 49355 | 48103     |
| Intronic (No.)          | 2676  | 2487      |
| ncRNA (No.)             | 1341  | 1347      |
| 3-UTR (No.)             | 16717 | 16540     |
| Splice (No.)            | 1138  | 1135      |

**Table S2.** Types of nucleotide substitutions in detected homozygote polymorphic SNPs between WT and *pl*

| Types of nucleotide substitution | WT   | <i>pl</i> |
|----------------------------------|------|-----------|
| Transitions                      |      |           |
| A->G                             | 9029 | 9366      |
| C->T                             | 9816 | 10032     |
| G->A                             | 9803 | 9956      |
| T->C                             | 9033 | 9363      |
| Transversions                    |      |           |
| A->C                             | 2397 | 2560      |
| A->T                             | 1762 | 1872      |
| C->A                             | 3692 | 3251      |
| C->G                             | 2542 | 2688      |
| G->C                             | 2555 | 2700      |
| G->T                             | 3669 | 3200      |
